# Supplementary material for: Novel Microsynthesis of High-Yield Gold Nanoparticles to Accelerate Research in Biosensing and Other Bioapplications
Source: MDPI journal article supplement (doi:10.3390/bios13120992), 2023-11-21
Supplement: s1 [file s1]

## Supplementary material to the manuscript

### Novel microsynthesis of high-yield gold nanoparticles to accelerate research in biosensing and other bioapplications

Víctor Díaz-García\*, Astrid Haensgen, Ligia Inostroza, Eduardo Zúñiga, Braulio Contreras-Trigo,  
Patricio Oyarzún\*

*Facultad de Ingeniería, Arquitectura y Diseño, Universidad San Sebastián, Lientur 1457, Concepción  
4080871, Chile*

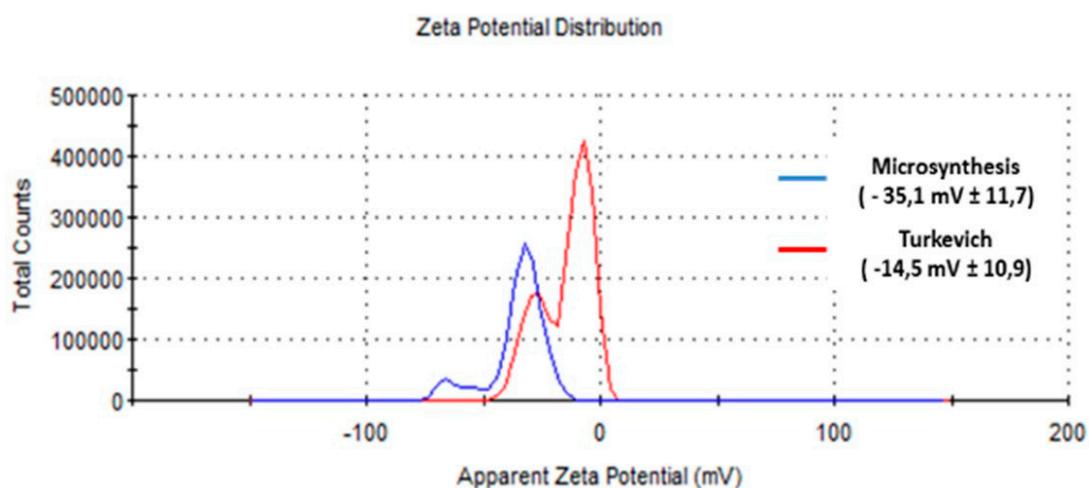

Figure S1: Zeta potential distribution (mV) of citrate-capped m-AuNPs (blue), and t-AuNPs (red). Inset shows the Zeta potential values determined for each sample.

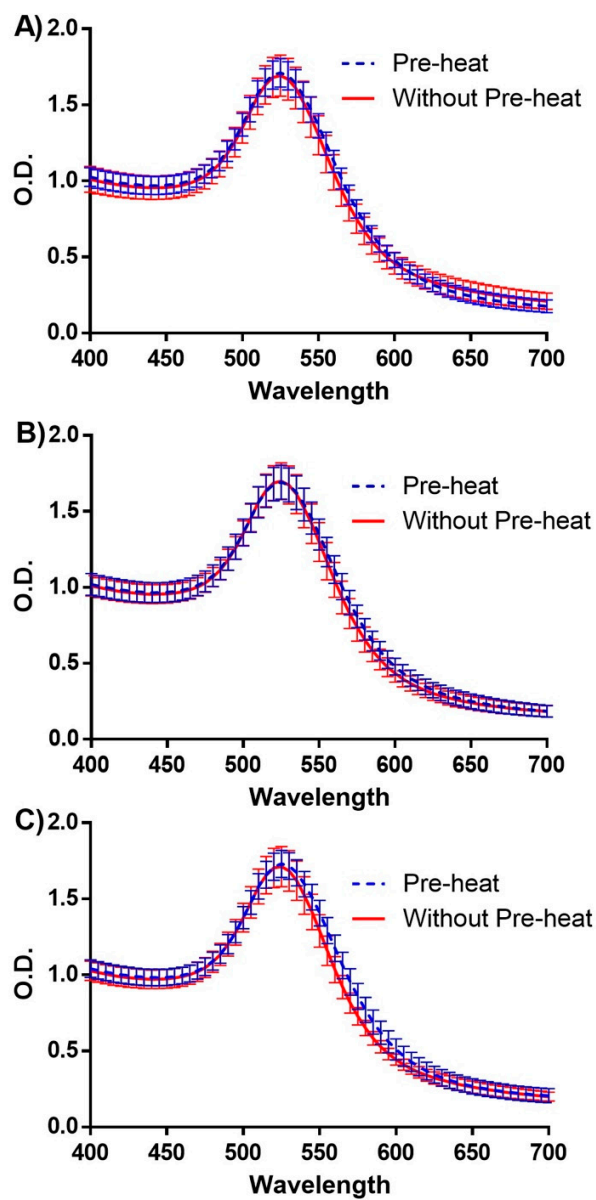

Figure S2: Spectroscopy characterization of microsynthesized AuNPs at different volumes with (blue segmented line) or without pre-heat treatments (red line). A) Absorption spectra of AuNPs obtained in 5 mL of synthesis solutions. B) Absorption spectra of AuNPs obtained in 10 mL of synthesis solutions. C) Absorption spectra of AuNPs obtained in 15 mL of synthesis solutions. Each curve represents the average from 3 independent experiments ( $n = 3$ ).

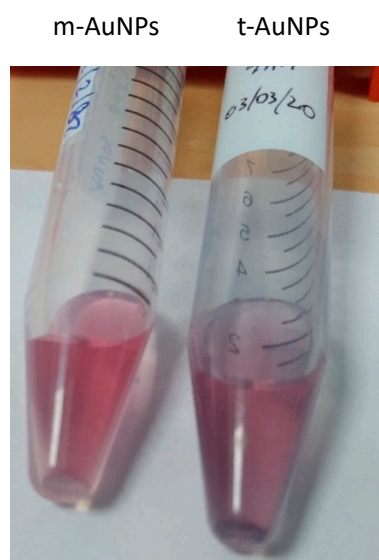

Figure S3: Image of falcon tubes that containing the m-AuNPs and t-AuNPs solutions for 3 years. Notes the black precipitate associated to gold precipitation.

Table S1: Spectroscopic variation of microsynthesized AuNPs at different reaction volumes with and without pre-heat treatments. Each value represents the average from 3 independent experiments (n = 3).

| Area under the curve (400-700nm) | 5mL      |                  | 10 mL    |                  | 15 mL    |                  |
|----------------------------------|----------|------------------|----------|------------------|----------|------------------|
|                                  | Pre-heat | without Pre-heat | Pre-heat | without Pre-heat | Pre-heat | without Pre-heat |
| Average                          | 252,3    | 249,1            | 251,2    | 245,4            | 259,4    | 249,4            |
| SD                               | 17,7     | 24,7             | 19,7     | 20,6             | 17,0     | 16,9             |
| %CV                              | 7,0      | 9,9              | 7,9      | 8,4              | 6,6      | 6,8              |

Table S2: Costs analysis and comparison between Turkevich and Microsynthesis methods.

| Materials                | Price (US\$)/Amount | Turkevich method |             | Microsynthesis method |             |
|--------------------------|---------------------|------------------|-------------|-----------------------|-------------|
|                          |                     | Required amount  | Cost (US\$) | Required amount       | Cost (US\$) |
| HCl 37 %                 | 42/2.5 L            | 150 mL           | 2,52        | -                     | -           |
| HNO3 69 %                | 57/2.5 L            | 50 mL            | 1,14        | -                     | -           |
| HAuCl4 99 %              | 516/1 g             | 40 mg            | 20,64       | 40 mg                 | 20,64       |
| Na3-Citrate              | 96/500 g            | 114 mg           | 0,02        | 114 mg                | 0,02        |
| Nanopure water           | 43/4 L              | 3 L              | 32,25       | 110 mL                | 1,18        |
| Nylon filter (0.45 µm)   | 72/200              | 1 unit           | 0,36        | -                     | -           |
| Micropipette Filter Tips | 12/100 units        | -                | -           | 20 units              | 2,4         |
| Microtube                | 25/1000 units       | -                | -           | 100 units             | 2,5         |
| Drinking water           | 0.8/1000 L          | 600 L            | 0,48        | -                     | -           |
| Electricity              | 0.18/KWh            | 250 KWh          | 0,04        | 153 KWh               | 0,03        |
| Human resource           | 22/h                | 4 h              | 88          | 2 h                   | 44          |
| Total Cost (US\$)        |                     |                  | 145,45      | 70,77                 |             |
